# Supplementary material
Source: PubMed Central journal article supplement (PMC5328150)
Supplement: ASN.2015111230SupplementaryData.pdf [file ASN.2015111230SupplementaryData.pdf]

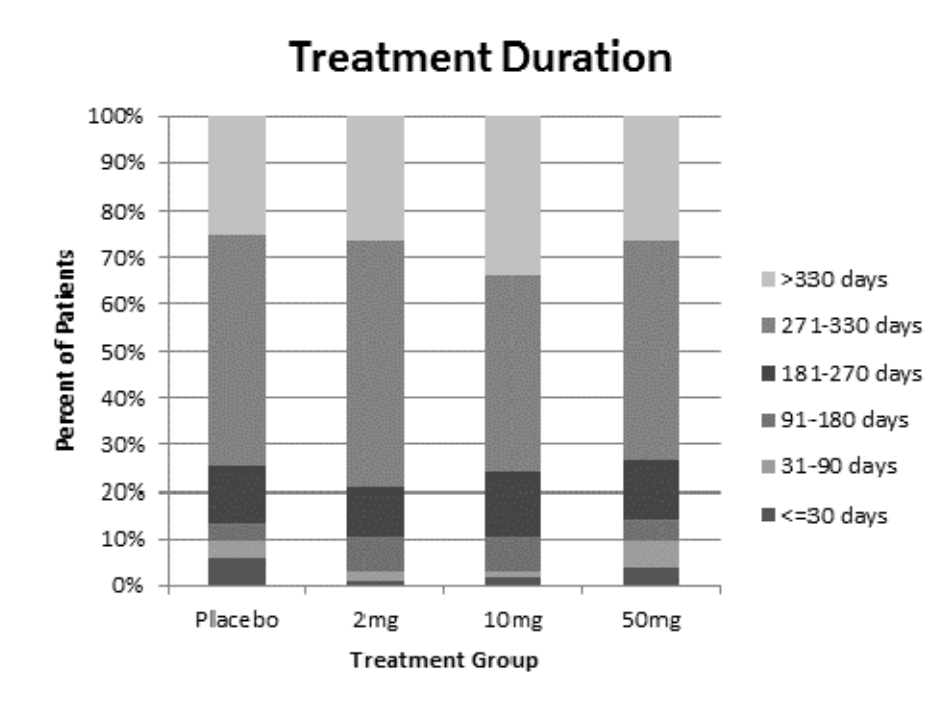

**Supplemental Figure:** Treatment Duration. Treatment duration is the time from the initial to the final dose of placebo or transforming growth factor- $\beta$ 1 monoclonal antibody treatment.

**Supplemental Table 1: Least Squares Changes from Baseline in Serum Creatinine, First-Morning UPCR and eGFR based on MMRM Analysis Expressed as Percents**

| Variable                                        | Placebo        | TGF- $\beta$ 1 mAb |                |                 |
|-------------------------------------------------|----------------|--------------------|----------------|-----------------|
|                                                 |                | 2 mg               | 10 mg          | 50 mg           |
| <b>Serum Creatinine (% change)*</b>             |                |                    |                |                 |
| 6 months                                        |                |                    |                |                 |
| <i>N</i>                                        | 89             | 91                 | 92             | 87              |
| LS mean                                         | 9%             | 12%                | 9%             | 12%             |
| 95% CI                                          | (6%, 12.9%)    | (8.2%, 15.2%)      | (6%, 12.9%)    | (8.2%, 15.2%)   |
| Endpoint                                        |                |                    |                |                 |
| <i>N</i>                                        | 85             | 90                 | 91             | 82              |
| LS mean                                         | 14%            | 20%                | 19%            | 19%             |
| 95% CI                                          | (9.7%, 18.2%)  | (15.3%, 24.3%)     | (14.2%, 23.0%) | (14.0%, 23.3%)  |
| *Back-transformed from log-transformed analysis |                |                    |                |                 |
| <b>First-Morning UPCR (% change)*</b>           |                |                    |                |                 |
| 6 months                                        |                |                    |                |                 |
| <i>N</i>                                        | 88             | 92                 | 94             | 90              |
| LS mean                                         | -9%            | -2%                | -4%            | -8%             |
| 95% CI                                          | (-19.7%, 4%)   | (-13.4%, 10.9%)    | (-15.1%, 8.7%) | (-18.6%, 4.6%)  |
| Endpoint                                        |                |                    |                |                 |
| <i>N</i>                                        | 82             | 87                 | 85             | 81              |
| LS mean                                         | 6%             | 5%                 | 5%             | -1%             |
| 95% CI                                          | (-8.5%, 23.2%) | (-8.7%, 21.1%)     | (-8.9%, 21.3%) | (-14.5%, 14.7%) |

\*Back-transformed from log-transformed analysis

**eGFR (% change)\*\***

6 months

|          |                 |                 |                 |                 |
|----------|-----------------|-----------------|-----------------|-----------------|
| <i>n</i> | 89              | 91              | 92              | 87              |
| LS mean  | -8%             | -12%            | -8%             | -10%            |
| 95% CI   | (-11.1%, -4.9%) | (-14.6%, -8.5%) | (-11.2%, -5.1%) | (-13.4%, -7.1%) |

Endpoint

|          |                 |                  |                  |                 |
|----------|-----------------|------------------|------------------|-----------------|
| <i>n</i> | 85              | 90               | 91               | 82              |
| LS mean  | -11%            | -17%             | -15%             | -14%            |
| 95% CI   | (-14.8%, -7.1%) | (-20.2%, -12.9%) | (-18.7%, -11.3%) | (-17.4%, -9.7%) |

\*\*Relative to overall baseline

mean = 35.464

**Supplemental Table 2: Observed Change from Baseline in Serum Creatinine, First Morning UPCR, and eGFR by Diabetes Type**

| Variable                              | Diabetes Type 1<br>TGF-β1 mAb |                 |                 |                 | Diabetes Type 2<br>TGF-β1 mAb |                 |                 |                  |
|---------------------------------------|-------------------------------|-----------------|-----------------|-----------------|-------------------------------|-----------------|-----------------|------------------|
|                                       | Placebo                       | 2 mg            | 10 mg           | 50 mg           | Placebo                       | 2 mg            | 10 mg           | 50 mg            |
| <b>Serum Creatinine (% change)</b>    |                               |                 |                 |                 |                               |                 |                 |                  |
| Baseline                              |                               |                 |                 |                 |                               |                 |                 |                  |
| <i>n</i>                              | 10                            | 12              | 11              | 11              | 93                            | 92              | 92              | 93               |
| mean ± SD                             | 2.39 ± 0.6170                 | 2.010 ± 0.5393) | 2.097 ± 0.5991) | 2.083 ± 0.5368) | 2.190 ± 0.5890                | 2.145 ± 0.5913) | 2.090 ± 0.6631  | 2.137 ± 0.6446   |
| 6 months                              |                               |                 |                 |                 |                               |                 |                 |                  |
| <i>n</i>                              | 9                             | 11              | 7               | 11              | 80                            | 79              | 85              | 75               |
| mean ± SD                             | 2.81 ± 1.3738                 | 2.04 ± 0.6033   | 2.28 ± 0.7295   | 2.37 ± 0.7845   | 2.40 ± 0.7810                 | 2.43 ± 0.7210   | 2.36 ± 0.9624   | 2.48 ± 1.0639    |
| change from baseline                  | 0.545 ± 1.0107                | 0.157 ± 0.3392  | 0.351 ± 0.267   | 0.291 ± 0.4847  | 0.199 ± 0.4893                | 0.294 ± 0.4087  | 0.238 ± 0.4708  | 0.341 ± 0.6169   |
| Endpoint                              |                               |                 |                 |                 |                               |                 |                 |                  |
| <i>n</i>                              | 8                             | 11              | 9               | 11              | 77                            | 79              | 82              | 70               |
| mean ± SD                             | 2.888 ± 1.7714                | 2.326 ± 0.9012) | 2.464 ± 1.0946  | 2.683 ± 0.9889) | 2.449 ± 0.8541                | 2.523 ± 0.8231  | 2.553 ± 1.2074  | 2.440 ± (0.9427) |
| change from baseline                  | 0.683 ± 1.4361                | 0.354 ± 0.5053  | 0.486 ± 0.6056  | 0.600 ± 0.6401  | 0.296 ± 0.5409                | 0.416 ± 0.4734  | 0.468 ± 0.7821  | 0.382 ± 0.5638   |
| <b>First-Morning UPCR (% change)*</b> |                               |                 |                 |                 |                               |                 |                 |                  |
| Baseline                              |                               |                 |                 |                 |                               |                 |                 |                  |
| <i>n</i>                              | 10                            | 12              | 11              | 11              | 93                            | 92              | 92              | 93               |
| mean ± SD                             | 2.973 (2.2463)                | 2.733 (1.3390)  | 2.958 (2.9755)  | 2.549 (1.2113)  | 3.139 (2.5560)                | 3.333 (2.7023)  | 3.342 (2.3968)  | 3.480 (2.6422)   |
| 6 months                              |                               |                 |                 |                 |                               |                 |                 |                  |
| <i>n</i>                              | 10                            | 10              | 8               | 11              | 78                            | 81              | 86              | 78               |
| mean ± SD                             | 2.954 (2.1076)                | 2.463 (1.2339)  | 1.778 (0.9663)  | 3.072 (1.6895)  | 3.035 (2.8583)                | 4.125 (7.3198)  | 3.345 (2.6022)  | 3.572 (3.7607)   |
| change from baseline                  | -0.018 (1.8416)               | -0.228 (0.8209) | -0.451 (0.8750) | 0.523 (1.7339)  | 3.480 (2.6422)                | 0.784 (6.6378)  | -0.027 (1.7016) | 0.070 (2.2277)   |
| Endpoint                              |                               |                 |                 |                 |                               |                 |                 |                  |

|                          |                     |                     |                     |                     |                     |                     |                     |                     |
|--------------------------|---------------------|---------------------|---------------------|---------------------|---------------------|---------------------|---------------------|---------------------|
| <i>n</i>                 | 8                   | 9                   | 8                   | 11                  | 74                  | 78                  | 77                  | 69                  |
| mean ± SD                | 2.853<br>(2.5507)   | 2.765<br>(1.8852)   | 2.785<br>(1.2155)   | 2.519<br>(1.7709)   | 3.244<br>(2.7883)   | 3.587<br>(2.7881)   | 3.732<br>(3.3913)   | 3.622<br>(3.6162)   |
| change from baseline     | 0.053 (1.6057)      | 0.347 (2.2653)      | 0.938 (1.2299)      | -0.030 (1.6710)     | 0.445 (1.7827)      | 0.301 (2.5662)      | 0.426 (2.4007)      | 0.292 (2.3776)      |
| <b>eGFR (% change)**</b> |                     |                     |                     |                     |                     |                     |                     |                     |
| Baseline                 |                     |                     |                     |                     |                     |                     |                     |                     |
| <i>n</i>                 | 10                  | 12                  | 11                  | 11                  | 93                  | 92                  | 92                  | 93                  |
| mean ± SD                | 32.925<br>(10.8296) | 39.147<br>(11.8994) | 38.125<br>(14.8094) | 39.714<br>(13.7695) | 33.932<br>(11.1341) | 35.229<br>(11.7506) | 36.147<br>(12.2901) | 35.511<br>(11.9412) |
| 6 months                 |                     |                     |                     |                     |                     |                     |                     |                     |
| <i>n</i>                 | 9                   | 11                  | 7                   | 11                  | 80                  | 79                  | 85                  | 75                  |
| mean ± SD                | 31.614<br>(14.9630) | 38.656<br>(13.0290) | 34.265<br>(12.9940) | 35.749<br>(15.8001) | 31.206<br>(11.1442) | 30.703<br>(10.9503) | 32.885<br>(13.1696) | 32.027<br>(12.9026) |
| change from baseline     | -2.884 (6.3190)     | -2.091 (5.6400)     | -6.788 (3.4189)     | -3.965 (7.2730)     | -2.463 (5.7121)     | -4.483 (5.9590)     | -2.757 (5.5784)     | -3.890 (5.6290)     |
| Endpoint                 |                     |                     |                     |                     |                     |                     |                     |                     |
| <i>n</i>                 | 8                   | 11                  | 9                   | 11                  | 77                  | 79                  | 82                  | 70                  |
| mean ± SD                | 31.586<br>(12.4008) | 35.076<br>(13.8327) | 34.135<br>(15.0718) | 34.405<br>(20.7490) | 31.197<br>(12.2165) | 30.365<br>(12.7661) | 30.969<br>(13.4075) | 31.922<br>(12.6396) |
| change from baseline     | -4.779 (5.9044)     | -4.856 (10.2746)    | -7.058 (4.8196)     | -5.309 (17.9751)    | -3.240 (5.4473)     | -5.448 (5.5920)     | -5.197 (7.7911)     | -4.733 (6.6155)     |

**Supplemental Table 3: Treatment Effects on Exploratory Plasma Biomarkers**

|                                                                  | Baseline |        |       | 5.5 months |        |       | 12 months <sup>b</sup> |        |       |
|------------------------------------------------------------------|----------|--------|-------|------------|--------|-------|------------------------|--------|-------|
| Treatment <sup>a</sup>                                           | n        | Median | IQR   | n          | Median | IQR   | n                      | Median | IQR   |
| <b>Cystatin C (ng/mL)</b>                                        |          |        |       |            |        |       |                        |        |       |
| Placebo                                                          | 60       | 2733   | 1401  | 46         | 3040   | 1547  | 51                     | 3051   | 1757  |
| mAb 2 mg                                                         | 71       | 2558   | 1164  | 51         | 2831   | 1787  | 53                     | 2605   | 1065  |
| mAb 10 mg                                                        | 66       | 2638   | 1269  | 49         | 2900   | 1192  | 54                     | 2822   | 1208  |
| mAb 50 mg                                                        | 71       | 2589   | 1497  | 49         | 3055   | 1193  | 55                     | 2772   | 1158  |
| <b>Kidney injury molecule-1 (KIM-1 (ng/mL))</b>                  |          |        |       |            |        |       |                        |        |       |
| Placebo                                                          | 33       | 0.683  | 0.773 | 26         | 0.770  | 0.526 | 24                     | 0.901  | 0.830 |
| mAb 2 mg                                                         | 50       | 0.682  | 0.701 | 37         | 0.451  | 0.673 | 32                     | 0.491  | 1.053 |
| mAb 10 mg                                                        | 41       | 0.709  | 1.171 | 31         | 0.866  | 1.537 | 33                     | 0.780  | 0.914 |
| mAb 50 mg                                                        | 48       | 0.659  | 0.729 | 31         | 0.759  | 0.817 | 30                     | 0.872  | 0.840 |
| <b>Neutrophil gelatinase-associated lipocalin (NGAL (ng/mL))</b> |          |        |       |            |        |       |                        |        |       |
| Placebo                                                          | 61       | 284.2  | 212.3 | 45         | 374.8  | 221.6 | 28                     | 225.5  | 129.1 |
| mAb 2 mg                                                         | 74       | 255.5  | 247.7 | 53         | 279.6  | 184.6 | 29                     | 273.2  | 147.3 |
| mAb 10 mg                                                        | 68       | 260.1  | 202.3 | 51         | 337.6  | 255.2 | 30                     | 244.1  | 185.4 |
| mAb 50 mg                                                        | 75       | 295.8  | 205.6 | 51         | 317.6  | 270.8 | 29                     | 230.1  | 271.9 |
| <b>Soluble tumor necrosis factor receptor 2 (sTNFR2 (ng/mL))</b> |          |        |       |            |        |       |                        |        |       |
| Placebo                                                          | 60       | 9.77   | 3.43  | 46         | 10.32  | 2.80  | 28                     | 10.10  | 4.58  |
| mAb 2 mg                                                         | 71       | 8.68   | 3.50  | 48         | 9.21   | 3.97  | 29                     | 8.74   | 3.03  |

|                        | Baseline |        |      | 5.5 months |        |      | 12 months <sup>b</sup> |        |      |
|------------------------|----------|--------|------|------------|--------|------|------------------------|--------|------|
| Treatment <sup>a</sup> | n        | Median | IQR  | n          | Median | IQR  | n                      | Median | IQR  |
| <b>mAb 10 mg</b>       | 67       | 9.83   | 2.93 | 50         | 9.92   | 3.43 | 30                     | 10.14  | 3.89 |
| <b>mAb 50 mg</b>       | 72       | 8.92   | 4.44 | 49         | 9.42   | 3.71 | 28                     | 9.34   | 5.67 |

Abbreviation: IQR = interquartile range, mAb = monoclonal antibody

<sup>a</sup> mAb refers to transforming growth factor- $\beta$ 1 mAb treatment

<sup>b</sup> Last observation after 5.5 months carried forward

**Supplemental Table 4: Treatment Effects on Exploratory Urine Biomarkers<sup>a</sup>**

|                                                                         | Baseline |        |       | 5.5 months |        |       | 12 months <sup>c</sup> |        |       |
|-------------------------------------------------------------------------|----------|--------|-------|------------|--------|-------|------------------------|--------|-------|
| Treatment <sup>b</sup>                                                  | n        | Median | IQR   | n          | Median | IQR   | n                      | Median | IQR   |
| <b>Fibronectin (ug/mg)</b>                                              |          |        |       |            |        |       |                        |        |       |
| Placebo                                                                 | 55       | 1.613  | 3.182 | 43         | 1.535  | 2.966 | 54                     | 2.041  | 3.853 |
| mAb 2 mg                                                                | 62       | 2.117  | 2.834 | 48         | 1.959  | 2.425 | 60                     | 2.444  | 6.294 |
| mAb 10 mg                                                               | 67       | 1.662  | 3.194 | 52         | 2.440  | 3.122 | 66                     | 1.940  | 3.406 |
| mAb 50 mg                                                               | 67       | 2.235  | 5.170 | 47         | 2.487  | 5.706 | 64                     | 2.121  | 8.114 |
| <b>High Molecular Weight type IV collagen (HMW Collagen IV (ng/mg))</b> |          |        |       |            |        |       |                        |        |       |
| Placebo                                                                 | 56       | 28.68  | 35.97 | 44         | 11.67  | 17.44 | 55                     | 15.22  | 18.96 |
| mAb 2 mg                                                                | 64       | 16.95  | 29.10 | 52         | 10.53  | 12.16 | 62                     | 11.50  | 22.72 |
| mAb 10 mg                                                               | 67       | 16.23  | 37.10 | 52         | 11.07  | 13.45 | 66                     | 13.90  | 15.94 |
| mAb 50 mg                                                               | 69       | 19.71  | 42.04 | 49         | 7.98   | 13.14 | 66                     | 12.84  | 21.85 |
| <b>Monocyte chemotactic protein-1 (MCP-1 (pg/mg))</b>                   |          |        |       |            |        |       |                        |        |       |
| Placebo                                                                 | 55       | 399.1  | 374.4 | 44         | 405.9  | 300.7 | 54                     | 448.6  | 693.5 |
| mAb 2 mg                                                                | 63       | 572.8  | 508.0 | 51         | 520.2  | 628.7 | 61                     | 619.0  | 644.5 |
| mAb 10 mg                                                               | 67       | 458.5  | 505.6 | 52         | 454.3  | 533.8 | 66                     | 439.8  | 573.0 |
| mAb 50 mg                                                               | 67       | 443.6  | 529.1 | 50         | 434.9  | 611.8 | 64                     | 544.9  | 758.3 |
| <b>Matrix metalloproteinase-7 (MMP-7 (ng/mg))</b>                       |          |        |       |            |        |       |                        |        |       |
| Placebo                                                                 | 54       | 10.73  | 12.73 | 40         | 10.13  | 13.29 | 24                     | 14.23  | 17.52 |
| mAb 2 mg                                                                | 62       | 16.45  | 18.79 | 47         | 15.56  | 20.20 | 18                     | 10.96  | 22.00 |
| mAb 10 mg                                                               | 66       | 10.19  | 15.65 | 49         | 12.21  | 19.03 | 25                     | 9.64   | 10.19 |



|                        | Baseline |        |       | 5.5 months |        |       | 12 months <sup>c</sup> |        |       |
|------------------------|----------|--------|-------|------------|--------|-------|------------------------|--------|-------|
| Treatment <sup>b</sup> | n        | Median | IQR   | n          | Median | IQR   | n                      | Median | IQR   |
| <b>mAb 50 mg</b>       | 68       | 9.54   | 18.94 | 45         | 12.09  | 21.23 | 25                     | 13.52  | 22.55 |

Abbreviation: IQR = interquartile range, mAb = monoclonal antibody

<sup>a</sup> Marker adjusted for urine creatinine excretion

<sup>b</sup> mAb refers to transforming growth factor- $\beta$ 1 mAb treatment

<sup>c</sup> Last observation after 5.5 months carried forward

## **Supplemental Table 5: List of Principal Investigators**

### **Australia**

Paul Champion de Crespigny, M.D.  
Margaret Jardine, M.D.  
Prof. Robyn Langham  
Mathew Mathew, M.D.  
Prof. Lawrence McMahon  
Peter Mount, Ph.D.  
Prof. David Packham  
Prof. Simon Roger  
Prof. Graeme Russ  
Michael Suranyi, Ph.D  
Mark A B Thomas, M.D.  
Prof. Rowan Walker  
Dennis K Yue, Ph.D.

### **Czech Republic**

Katerina Kotherova, M.D.  
Richard Kovar, M.D.  
Ladislava Lyerova, M.D.  
Alexandra Oplustilova, M.D.  
Miroslav Ryba, M.D.  
Ivan Rychlik, Assoc. Prof., M.D., Ph.D., FASN  
Frantisek Saudek, M.D.  
Jirina Suchanova, M.D.  
Sylvie Schwarzova, M.D.  
Vladimir Tesar, Prof, M.D., Ph.D., MBA, FASN  
Martin Ullrych, M.D.

### **France**

Jean-Pierre Fauvel, M.D., Ph.D.  
Luc Frimat, M.D., Ph.D.,  
Céline Lebas, M.D.  
Marc Levy, M.D.  
Philippe Zaoui, M.D., Ph.D.

### **Hungary**

Dora Bajcsi, M.D.  
Laszlo Deak, M.D.  
Sandor Ferenczi, M.D.  
Nora Kesmarki, M.D.  
Laszlo Konyves, M.D.  
Laszlo Koranyi, M.D.  
Attila Mohacsi, M.D.  
Marta Molnar, M.D.  
Tamas Oroszlan, M.D.  
Ferenczi Sandor, M.D.  
Adam Tabak, M.D., Ph.D.  
Peter Voros, M.D.

### **Israel**

Faiad Adawi, M.D.  
Amir Bashkin, M.D.  
Ilia Beberashvili, M.D.  
Sydney Benchetrit, M.D.  
Ilana Harman Boehm  
Anat Jaffe, M.D., Ph.D.  
Eddy Karnieli, M.D.  
Prof. Hilla Knobler  
Nomy Levin – Iaina, M.D.  
Ofri Mosenzon, M.D.

Doron Schwartz, M.D.  
Carmela Shechner, M.D.  
Itzhak Slotki, M.D.  
Julio Wainstein, M.D.  
Yoram Yagil, M.D.  
Yair Yerushalmi

**United States and Puerto Rico**

Mario Belledonne, M.D.  
Samuel S. Blumenthal, M.D.  
Rafael Burgos Calderon, M.D.  
Jose L. Cangiano, M.D.  
Michel B. Chonchol, M.D.  
Peale Chuang  
Troy Everett Dixon, M.D.  
Sohan L. Duo, M.D.  
Jamie P. Dwyer, M.D.  
Michael E. Feldman, M.D.  
Gregory M. Haugen, M.D.  
Kianoosh Kaveh, D.O.  
William A. Kaye, M.D.  
Amina Khan, M.D.  
Andrew Lazar, M.D.  
Carlos A. Leon-Ferero, M.D.  
Barton S. Levine, M.D.  
John P. Middleton, M.D.  
Amy K. Mottl, M.D.  
Moustafa A. Moustafa, M.D.  
Jesus Navarro, M.D.  
Imarn Nazeer, M.D.  
Leann Olansky, M.D.  
Mordecai M. Popvtzer, M.D.

David S. Ramstad, M.D., MPH  
Philip Raskin, M.D.  
Marc S. Rendell, M.D.  
Efrain Reisin, M.D.  
Michael V. Rocco, M.D.  
Raul M. Rodelas, M.D.  
Amaury A. Roman-Miranda, M.D.  
Dennis L. Ross, M.D.  
Cranford Scott, M.D.  
Douglas Shemin, M.D.  
Marvin V. Sinsakul, M.D.  
Sorin Vainer, M.D.  
Carl D. Vance, M.D.  
Mark Lowe Warren, M.D.
